# Supplementary material for: Differentiating Huangjiu with Varying Sugar Contents from Different Regions Based on Targeted Metabolomics Analyses of Volatile Carbonyl Compounds
Source: MDPI journal article supplement (doi:10.3390/foods12071455), 2023-03-29
Supplement: s1 [file s1]

**Table S1.** Experimental conditions and response values (total area) of the CCD used to optimize the derivatization conditions of volatile compounds in *Huangjiu*.

| Run | t <sub>inc</sub> (min)<br><sup>a</sup> | PFBHA<br>(g/L) | T <sub>ex</sub> (°C) <sup>b</sup> | t <sub>ex</sub> (min) <sup>c</sup> | Response value<br>(total area) <sup>d</sup> |
|-----|----------------------------------------|----------------|-----------------------------------|------------------------------------|---------------------------------------------|
| 1   | 6                                      | 1              | 40                                | 30                                 | 261334010                                   |
| 2   | 12                                     | 1              | 40                                | 30                                 | 254926762                                   |
| 3   | 6                                      | 2              | 40                                | 30                                 | 255650273                                   |
| 4   | 12                                     | 2              | 40                                | 30                                 | 223717408                                   |
| 5   | 6                                      | 1              | 60                                | 30                                 | 341573948                                   |
| 6   | 12                                     | 1              | 60                                | 30                                 | 328045601                                   |
| 7   | 6                                      | 2              | 60                                | 30                                 | 369272000                                   |
| 8   | 12                                     | 2              | 60                                | 30                                 | 334673316                                   |
| 9   | 6                                      | 1              | 40                                | 50                                 | 359097201                                   |
| 10  | 12                                     | 1              | 40                                | 50                                 | 333905880                                   |
| 11  | 6                                      | 2              | 40                                | 50                                 | 263236801                                   |
| 12  | 12                                     | 2              | 40                                | 50                                 | 248411763                                   |
| 13  | 6                                      | 1              | 60                                | 50                                 | 486483188                                   |
| 14  | 12                                     | 1              | 60                                | 50                                 | 434496667                                   |
| 15  | 6                                      | 2              | 60                                | 50                                 | 434562786                                   |
| 16  | 12                                     | 2              | 60                                | 50                                 | 397470405                                   |
| 17  | 3                                      | 1.5            | 50                                | 40                                 | 393053751                                   |
| 18  | 15                                     | 1.5            | 50                                | 40                                 | 350110046                                   |
| 19  | 9                                      | 0.5            | 50                                | 40                                 | 290108195                                   |
| 20  | 9                                      | 2.5            | 50                                | 40                                 | 262764688                                   |
| 21  | 9                                      | 1.5            | 30                                | 40                                 | 203081000                                   |
| 22  | 9                                      | 1.5            | 70                                | 40                                 | 474896338                                   |
| 23  | 9                                      | 1.5            | 50                                | 20                                 | 256300448                                   |
| 24  | 9                                      | 1.5            | 50                                | 60                                 | 401737386                                   |
| 25  | 9                                      | 1.5            | 50                                | 40                                 | 367972080                                   |
| 26  | 9                                      | 1.5            | 50                                | 40                                 | 354400686                                   |
| 27  | 9                                      | 1.5            | 50                                | 40                                 | 342805869                                   |
| 28  | 9                                      | 1.5            | 50                                | 40                                 | 358260426                                   |
| 29  | 9                                      | 1.5            | 50                                | 40                                 | 346709151                                   |

<sup>a</sup>t<sub>inc</sub>-incubation time.

<sup>b</sup>T<sub>ex</sub>- extraction and incubation temperature.

<sup>c</sup>t<sub>ex</sub>-extraction time.

<sup>d</sup>Total area in expressed in arbitrary units.

**Table S2.** ANOVA study for responses.

| Source         | Sum of squares        | df | Mean square           | F value | p-value<br>Prob>F | Remarks         |
|----------------|-----------------------|----|-----------------------|---------|-------------------|-----------------|
| Model          | $1.50 \times 10^{17}$ | 14 | $1.07 \times 10^{16}$ | 72.81   | < 0.0001          | Significant     |
| A-tinc         | $3.79 \times 10^{15}$ | 1  | $3.79 \times 10^{15}$ | 25.68   | 0.0002            |                 |
| B-PFBHA        | $4.47 \times 10^{15}$ | 1  | $4.47 \times 10^{15}$ | 30.33   | < 0.0001          |                 |
| C-TeX          | $9.00 \times 10^{16}$ | 1  | $9.00 \times 10^{16}$ | 610.72  | < 0.0001          |                 |
| D-tex          | $3.22 \times 10^{16}$ | 1  | $3.22 \times 10^{16}$ | 218.56  | < 0.0001          |                 |
| AB             | $2.85 \times 10^{13}$ | 1  | $2.85 \times 10^{13}$ | 0.19    | 0.6671            |                 |
| AC             | $2.16 \times 10^{14}$ | 1  | $2.16 \times 10^{14}$ | 1.47    | 0.2457            |                 |
| AD             | $1.14 \times 10^{14}$ | 1  | $1.14 \times 10^{14}$ | 0.77    | 0.3949            |                 |
| BC             | $1.67 \times 10^{15}$ | 1  | $1.67 \times 10^{15}$ | 11.35   | 0.0046            |                 |
| BD             | $4.48 \times 10^{15}$ | 1  | $4.48 \times 10^{15}$ | 30.39   | < 0.0001          |                 |
| CD             | $1.82 \times 10^{15}$ | 1  | $1.82 \times 10^{15}$ | 12.31   | 0.0035            |                 |
| A <sup>2</sup> | $6.60 \times 10^{14}$ | 1  | $6.60 \times 10^{14}$ | 4.47    | 0.0528            |                 |
| B <sup>2</sup> | $9.12 \times 10^{15}$ | 1  | $9.12 \times 10^{15}$ | 61.84   | < 0.0001          |                 |
| C <sup>2</sup> | $2.50 \times 10^{14}$ | 1  | $2.50 \times 10^{14}$ | 1.70    | 0.2135            |                 |
| D <sup>2</sup> | $8.13 \times 10^{14}$ | 1  | $8.13 \times 10^{14}$ | 5.52    | 0.0340            |                 |
| Residual       | $2.06 \times 10^{15}$ | 14 | $1.47 \times 10^{14}$ |         |                   | not significant |
| Lack of Fit    | $1.67 \times 10^{15}$ | 10 | $1.67 \times 10^{14}$ | 1.71    | 0.3199            |                 |
| Pure Error     | $3.92 \times 10^{14}$ | 4  | $9.80 \times 10^{13}$ |         |                   |                 |
| Cor Total      | $1.52 \times 10^{17}$ | 28 |                       | 72.81   |                   |                 |

**Table S3.** Precision and accuracy of the proposed method.

| Compounds        | Precision(%, n=6)  |                    | Accuracy(%,n=3)      |           |                      |           |                      |            |
|------------------|--------------------|--------------------|----------------------|-----------|----------------------|-----------|----------------------|------------|
|                  |                    |                    | Low                  |           | Mid                  |           | High                 |            |
|                  | Intraday precision | Interday precision | Concentration (µg/L) | Recovery  | Concentration (µg/L) | Recovery  | Concentration (µg/L) | Recovery   |
| Propanal         | 1.1                | 3.3                | 4.6                  | 101.4±5.9 | 21.3                 | 100.2±0.3 | 40.0                 | 106.5±4.3  |
| Butanal          | 4.3                | 7.5                | 0.2                  | 106.8±6.3 | 6.7                  | 108.0±6.1 | 20.8                 | 99.9±2.1   |
| Pentanal         | 6.0                | 6.4                | 0.9                  | 98.4±6.9  | 25.5                 | 98.0±5.2  | 79.2                 | 91.3±9.1   |
| Hexanal          | 6.4                | 8.4                | 3.2                  | 100.6±9.4 | 10.9                 | 102.9±7.1 | 27.6                 | 107.2±5.0  |
| Heptanal         | 4.2                | 3.5                | 0.4                  | 99.6±5.7  | 10.5                 | 93.0±2.9  | 32.7                 | 106.3±10.4 |
| Octanal          | 8.7                | 7.2                | 0.2                  | 107.5±0.7 | 5.6                  | 102.1±2.7 | 17.5                 | 100.2±3.4  |
| Nonanal          | 5.0                | 7.5                | 0.5                  | 93.1±9.6  | 12.9                 | 105.0±6.7 | 40.0                 | 98.2±9.7   |
| Decanal          | 5.7                | 6.8                | 0.5                  | 98.4±3.2  | 14.6                 | 97.7±7.7  | 45.4                 | 95.5±4.0   |
| Undecanal        | 3.9                | 7.3                | 0.8                  | 96.8±1.4  | 23.5                 | 111.3±3.5 | 73.0                 | 100.3±5.4  |
| Dodecanal        | 7.4                | 9.8                | 0.3                  | 101.4±1.7 | 7.4                  | 98.7±5.6  | 22.8                 | 95.6±8.4   |
| Tridecanal       | 7.5                | 9.1                | 0.3                  | 97.2±5.0  | 7.1                  | 102.4±5.8 | 22.0                 | 97.8±3.3   |
| 2-Propenal       | 6.4                | 7.8                | 1.2                  | 100.5±3.2 | 34.7                 | 103.2±7.7 | 108.0                | 97.9±2.5   |
| (E)-2-Butenal    | 2.2                | 4.5                | 17.6                 | 100.7±1.2 | 60.7                 | 105.6±3.2 | 154.0                | 97.7±0.8   |
| (E)-2-Pentenal   | 4.7                | 6.6                | 1.4                  | 105.8±2.3 | 37.9                 | 97.6±5.3  | 117.0                | 96.9±1.6   |
| (E)-2-Hexenal    | 4.9                | 7.0                | 0.3                  | 94.7±5.3  | 7.5                  | 101.3±7.0 | 23.1                 | 108.6±2.0  |
| (E)-2-Heptenal   | 7.6                | 8.5                | 0.2                  | 107.9±3.5 | 5.6                  | 97.9±7.4  | 17.5                 | 94.1±11.9  |
| (E)-2-Octenal    | 3.4                | 7.3                | 0.3                  | 94.5±7.1  | 7.3                  | 102.0±2.3 | 22.5                 | 101.0±7.0  |
| (E)-2-Nonenal    | 3.3                | 7.1                | 0.3                  | 100.3±5.8 | 8.00                 | 99.1±4.1  | 24.8                 | 93.4±8.4   |
| (E)-2-Decenal    | 5.1                | 8.8                | 0.3                  | 98.4±7.5  | 7.2                  | 92.8±4.5  | 22.3                 | 110.2±4.0  |
| 2-Methylpropanal | 6.5                | 8.1                | 10.6                 | 100.0±4.9 | 149.0                | 99.4±4.8  | 924.0                | 103.6±5.0  |
| 2-Methylbutanal  | 4.5                | 6.9                | 7.1                  | 99.6±1.9  | 100.0                | 100.6±5.5 | 620.0                | 100.4±2.8  |

|                         |     |     |       |            |        |           |         |            |
|-------------------------|-----|-----|-------|------------|--------|-----------|---------|------------|
| 3-Methylbutanal         | 9.3 | 7.9 | 25.4  | 101.1±4.6  | 357.0  | 100.0±6.2 | 2214.0  | 96.6±4.2   |
| 3-Methyl-2-butenal      | 6.0 | 7.5 | 0.2   | 103.1±5.6  | 5.9    | 95.9±5.4  | 18.3    | 102.9±1.7  |
| Methional               | 3.4 | 3.7 | 8.8   | 100.3±3.3  | 30.4   | 105.1±3.2 | 77.2    | 99.2±2.3   |
| Benzaldehyde            | 5.3 | 3.9 | 32.1  | 105.9±2.5  | 453.0  | 102.8±5.7 | 2806.0  | 103.2±2.0  |
| Phenyl acetaldehyde     | 4.3 | 9.4 | 17.1  | 94.7±4.8   | 58.9   | 100.1±4.3 | 149.0   | 100.1±2.8  |
| Diacetyl                | 5.6 | 8.5 | 3.4   | 101.1±11.0 | 11.8   | 100.6±6.7 | 29.9    | 97±1.6.0   |
| Methyl glyoxal          | 2.4 | 2.6 | 4.0   | 99.9±3.8   | 13.7   | 101.2±2.1 | 34.7    | 94.8±2.5   |
| Glyoxal                 | 6.0 | 6.4 | 2.5   | 102.3±6.7  | 34.9   | 94.5±1.9  | 216.0   | 100.7±7.4  |
| 3-Methyl-2-butanone     | 3.1 | 5.7 | 0.5   | 106.4±8.1  | 14.9   | 98.0±0.8  | 46.2    | 104.3±8.5  |
| 2-Pentanone             | 7.7 | 8.1 | 0.3   | 96.1±5.8   | 7.1    | 102.1±4.0 | 22.0    | 97.1±6.1   |
| 3-Pentanone             | 5.2 | 8.3 | 0.5   | 100.3±10.5 | 15.1   | 106.0±5.7 | 46.8    | 98.8±8.8   |
| 2-Hexanone              | 6.2 | 6.6 | 0.2   | 95.5±6.9   | 5.0    | 95.8±8.1  | 15.5    | 96.6±4.9   |
| 4-Heptanone             | 5.8 | 9.3 | 0.4   | 104.0±3.3  | 12.5   | 108.8±6.9 | 38.6    | 101.8±10.0 |
| 2-Heptanone             | 8.1 | 9.6 | 0.4   | 95.4±4.3   | 12.2   | 99.6±8.8  | 37.7    | 98.6±6.7   |
| 2-Octanone              | 5.4 | 6.4 | 0.4   | 99.9±1.9   | 11.4   | 96.4±5.2  | 35.5    | 100.2±10.7 |
| 2-Nonanone              | 5.2 | 5.5 | 0.3   | 103±1.4    | 8.9    | 99.3±4.0  | 27.6    | 98.1±1.6   |
| 2-Decanone              | 7.6 | 9.3 | 0.3   | 102.9±6.4  | 7.4    | 98.7±5.6  | 22.8    | 91.2±1.9   |
| 2-Furfural              | 6.2 | 7.3 | 65.9  | 96.5±2.5   | 928.0  | 100.6±2.8 | 5752.0  | 99.9±2.2   |
| 5-Methyl-2-furfural     | 6.4 | 4.9 | 9.0   | 99.5±7.0   | 30.9   | 106.4±2.9 | 78.3    | 97.7±2.3   |
| 3-Penten-2-one          | 4.0 | 4.6 | 7.9   | 98.9±4.2   | 111.0  | 99.4±2.6  | 687.0   | 100.0±4.0  |
| 1-Octen-3- one          | 7.3 | 6.6 | 0.3   | 91.2±3.2   | 7.6    | 93.8±8.3  | 23.7    | 99.1±10.4  |
| 6-Methyl-5-hepten-2-one | 5.2 | 4.5 | 0.5   | 97.6±5.1   | 13.8   | 100.1±4.5 | 42.8    | 96.0±3.1   |
| Cyclopentanone          | 3.9 | 8.5 | 0.3   | 97.0±1.0   | 7.1    | 108.6±3.2 | 22.0    | 98.7±1.4   |
| Cyclohexanone           | 7.4 | 9.8 | 0.3   | 101.4±5.5  | 7.6    | 96.3±5.4  | 23.4    | 105.8±4.1  |
| 2-Cyclohexen-1-one      | 4.4 | 7.6 | 0.3   | 100.0±2.0  | 7.9    | 102.5±5.6 | 24.5    | 98.3±8.0   |
| Acetoin                 | 3.5 | 5.9 | 101.0 | 102.3±1.7  | 7114.0 | 96.4±2.3  | 15650.0 | 99.1±0.5   |

|                    |     |     |     |           |      |           |       |           |
|--------------------|-----|-----|-----|-----------|------|-----------|-------|-----------|
| Acetophenone       | 3.5 | 3.8 | 1.3 | 101.2±7.4 | 35.7 | 98.0±1.9  | 111.0 | 106.0±1.8 |
| 2-Phenyl-2-butenal | 6.3 | 7.0 | 3.9 | 102.9±3.8 | 54.9 | 101.0±4.3 | 340.0 | 98.7±4.5  |

---

**Table S4.** The range of volatile carbonyl compounds in semi-dry *Huangjiu* from different production areas.

| Compound (μg/L)  | SDJ (n=6)           |                           | SDZ (n=9)           |                           | SDS (n=4)           |                           | SDF (n=8)           |                            |
|------------------|---------------------|---------------------------|---------------------|---------------------------|---------------------|---------------------------|---------------------|----------------------------|
|                  | Concentration range | Mean±SD                    |
| Propanal         | 30.35~61            | 44.5 <sup>b</sup> ±10.49  | 38.03~89.44         | 58.4 <sup>b</sup> ±15.17  | 38.16~64.43         | 51.27 <sup>b</sup> ±11.22 | 35.31~336.92        | 179 <sup>a</sup> ±103.3    |
| Butanal          | 3.34~16.84          | 9.45 <sup>a</sup> ±5.12   | 3.17~23.74          | 8.96 <sup>a</sup> ±6.15   | 5.62~17.46          | 9.77 <sup>a</sup> ±5.34   | 0.33~12.58          | 7.51 <sup>a</sup> ±4.14    |
| Pentanal         | 8.82~26.65          | 18.07 <sup>c</sup> ±7.04  | 10.67~37.58         | 25.66 <sup>bc</sup> ±9.18 | 33.38~40.65         | 37.02 <sup>b</sup> ±3.86  | 35.55~84.82         | 57.13 <sup>a</sup> ±16.76  |
| Hexanal          | 18.9~45.23          | 30.33 <sup>b</sup> ±10.43 | 21.73~70.92         | 47.49 <sup>a</sup> ±13.78 | 43.58~55.68         | 49.18 <sup>a</sup> ±5.10  | 21.67~42.98         | 30.74 <sup>b</sup> ±7.85   |
| Heptanal         | 0.54~1.1            | 0.83 <sup>b</sup> ±0.3    | 0.89~1.85           | 1.29 <sup>b</sup> ±0.30   | 1.16~1.73           | 1.42 <sup>b</sup> ±0.26   | 1.78~4.01           | 2.8 <sup>a</sup> ±0.75     |
| Octanal          | 0.4~6.74            | 2.53 <sup>a</sup> ±3.18   | 0.35~0.56           | 0.46 <sup>ab</sup> ±0.08  | 0.34~0.51           | 0.43 <sup>b</sup> ±0.08   | 0.17~0.57           | 0.37 <sup>b</sup> ±0.13    |
| Nonanal          | 0.26~4.11           | 1.43 <sup>a</sup> ±1.43   | nq~6.9              | 3.7 <sup>a</sup> ±2.20    | 1.41~9.43           | 4.17 <sup>a</sup> ±3.76   | nq~8.75             | 3.94 <sup>a</sup> ±2.88    |
| Decanal          | 2.29~8.28           | 4.84 <sup>ab</sup> ±3     | 4.15~13.77          | 8.42 <sup>a</sup> ±3.42   | 4.1~6.36            | 5.27 <sup>ab</sup> ±0.94  | 0.63~8.49           | 3.35 <sup>b</sup> ±2.45    |
| Undecanal        | nd~0.53             | 0.11 <sup>b</sup> ±0.22   | 1.27~10.67          | 4.18 <sup>b</sup> ±3.34   | nd~6.33             | 3.31 <sup>b</sup> ±2.7    | 3.2~14.34           | 9.15 <sup>a</sup> ±3.65    |
| Dodecanal        | 4.52~11.51          | 7.3 <sup>b</sup> ±2.57    | 1.99~10.7           | 6.23 <sup>b</sup> ±3.13   | 8.94~16.27          | 11.5 <sup>a</sup> ±3.30   | 1.64~9.16           | 4 <sup>b</sup> ±2.4        |
| Tridecanal       | nd                  | nd <sup>a</sup>            |
| 2-Propenal       | 0.83~2.12           | 1.43 <sup>ab</sup> ±0.49  | 0.38~5.49           | 2.94 <sup>a</sup> ±1.9    | 1.87~3.76           | 2.95 <sup>a</sup> ±0.82   | 0.21~1.42           | 0.83 <sup>b</sup> ±0.47    |
| (E)-2-Butenal    | 88.76~241.7         | 140.4 <sup>c</sup> ±54.6  | 172.7~403.6         | 294.3 <sup>b</sup> ±83.58 | 218.7~663.6         | 498.6 <sup>a</sup> ±248.5 | 104.6~281.1         | 206.3 <sup>bc</sup> ±58.32 |
| (E)-2-Pentenal   | 3.24~4.92           | 3.75 <sup>a</sup> ±0.63   | 2.38~5.5            | 3.89 <sup>a</sup> ±0.95   | 2.28~4.93           | 3.77 <sup>a</sup> ±1.15   | 1.26~4.41           | 3.28 <sup>a</sup> ±1.10    |
| (E)-2-Hexenal    | 0.31~2.93           | 1.03 <sup>a</sup> ±0.98   | 0.68~5.31           | 2.24 <sup>a</sup> ±1.43   | 1.24~3.54           | 2.1 <sup>a</sup> ±1.06    | 0.62~2.93           | 1.65 <sup>a</sup> ±0.75    |
| (E)-2-Heptenal   | 0.1~0.14            | 0.11 <sup>b</sup> ±0.02   | 0.11~0.16           | 0.13 <sup>ab</sup> ±0.03  | 0.1~0.17            | 0.13 <sup>ab</sup> ±0.04  | 0.13~0.22           | 0.16 <sup>a</sup> ±0.04    |
| (E)-2-Octenal    | 0.29~0.38           | 0.33 <sup>a</sup> ±0.05   | 0.29~0.35           | 0.32 <sup>a</sup> ±0.03   | 0.3~0.36            | 0.34 <sup>a</sup> ±0.04   | 0.3~0.33            | 0.31 <sup>a</sup> ±0.02    |
| (E)-2-Nonenal    | 0.37~0.47           | 0.42 <sup>a</sup> ±0.05   | 0.38~0.53           | 0.45 <sup>a</sup> ±0.06   | 0.38~0.44           | 0.41 <sup>a</sup> ±0.04   | 0.39~0.65           | 0.47 <sup>a</sup> ±0.2     |
| (E)-2-Decenal    | nd                  | nd <sup>a</sup>           | nd                  | nd <sup>a</sup>           | nd                  | nd <sup>a</sup>           | nd~1.38             | 0.22 <sup>a</sup> ±0.48    |
| 2-Methylpropanal | 687.3~1273          | 913.1 <sup>b</sup> ±230.8 | 895.8~1606          | 1151 <sup>ab</sup> ±251.6 | 1008~2413           | 1647 <sup>a</sup> ±585.4  | 379.5~1752          | 844.5 <sup>b</sup> ±483.5  |
| 2-Methylbutanal  | 558.9~968.7         | 727.7 <sup>b</sup> ±153.5 | 734.6~1437          | 1027 <sup>ab</sup> ±261.6 | 1100~1721           | 1365 <sup>a</sup> ±259.9  | 348.7~1501          | 757.7 <sup>b</sup> ±382.5  |
| 3-Methylbutanal  | 2183~3777           | 2868 <sup>b</sup> ±651    | 2792~5408           | 4087 <sup>ab</sup> ±916.5 | 4588~6560           | 5405 <sup>a</sup> ±875.6  | 1393~6033           | 3469 <sup>b</sup> ±1794    |

|                         |              |                            |             |                           |             |                             |             |                            |
|-------------------------|--------------|----------------------------|-------------|---------------------------|-------------|-----------------------------|-------------|----------------------------|
| 3-Methyl-2-butenal      | 2.89~7.15    | 4.29 <sup>b</sup> ±1.94    | 3.48~5.72   | 5.04 <sup>b</sup> ±0.80   | 5.33~9.72   | 7.94 <sup>a</sup> ±1.87     | 2.91~6.82   | 4.89 <sup>b</sup> ±1.66    |
| Methional               | nq~733.6     | 435.75 <sup>a</sup> ±304.5 | 61~211.2    | 124.7 <sup>b</sup> ±53.26 | 120.2~250.2 | 169 <sup>b</sup> ±59.1      | nd~241.6    | 97.14 <sup>b</sup> ±90.03  |
| Benzaldehyde            | 743.5~1934   | 129 <sup>b</sup> ±465.6    | 2295~4893   | 3610 <sup>a</sup> ±932.6  | 2471~4048   | 3226 <sup>a</sup> ±712.6    | 1569~4911   | 2555 <sup>ab</sup> ±1135   |
| Phenyl acetaldehyde     | 122.7~216.4  | 167.5 <sup>ab</sup> ±37.58 | 152.6~269.6 | 214.9 <sup>a</sup> ±39.29 | 214.1~230.5 | 220.8 <sup>a</sup> ±7.14    | 55.22~196.1 | 110.7 <sup>b</sup> ±51.52  |
| Diacetyl                | 10.63~199.6  | 122 <sup>ab</sup> ±80.82   | 14.82~88.55 | 47.7 <sup>b</sup> ±22.97  | 32.06~63.35 | 48.52 <sup>b</sup> ±12.90   | 3.38~318.8  | 201.2 <sup>a</sup> ±109.5  |
| Glyoxal                 | 163.8~1164   | 670.4 <sup>b</sup> ±369.6  | 367.7~1377  | 784.7 <sup>b</sup> ±353.7 | 1329~2372   | 1833 <sup>a</sup> ±532      | 420.5~1342  | 767.1 <sup>b</sup> ±309.1  |
| Methyl glyoxal          | 8.51~858.4   | 327.8 <sup>b</sup> ±291.2  | 61.91~394.8 | 213.3 <sup>b</sup> ±120.8 | 391.1~637.2 | 499.9 <sup>b</sup> ±105.8   | 326.5~2231  | 1174 <sup>a</sup> ±587.8   |
| 2-Butanone*             | 270~682.4    | 468.9 <sup>c</sup> ±180.3  | 41.71~3198  | 1462 <sup>ab</sup> ±982.5 | 1145~2287   | 1811 <sup>a</sup> ±482      | 593.1~1397  | 882.1 <sup>bc</sup> ±301.5 |
| 3-Methyl-2-butanone     | 2.4~9.91     | 6.12 <sup>c</sup> ±2.85    | 5.05~27.3   | 14 <sup>bc</sup> ±7.44    | 14.67~30.03 | 20.79 <sup>ab</sup> ±6.85   | 16.88~54.38 | 31.74 <sup>a</sup> ±12.99  |
| 2-Pentanone             | 3.17~8.24    | 5.23 <sup>b</sup> ±1.8     | 2.01~7.21   | 4.72 <sup>b</sup> ±1.85   | 4.52~12.15  | 8.18 <sup>a</sup> ±3.95     | 4.29~5.76   | 4.96 <sup>b</sup> ±0.55    |
| 3-Pentanone             | 0.87~9.3     | 4.74 <sup>b</sup> ±3.6     | 4.86~21.97  | 10.47 <sup>ab</sup> ±5.28 | 10.67~15.55 | 14.3 <sup>ab</sup> ±2.43    | 3.03~15.48  | 9.87 <sup>ab</sup> ±4.35   |
| 2-Hexanone              | 1.19~4.71    | 2.65 <sup>a</sup> ±1.33    | 0.11~4.91   | 3.44 <sup>a</sup> ±1.39   | 3.09~5.3    | 3.97 <sup>a</sup> ±0.96     | 1.45~4.54   | 2.83 <sup>a</sup> ±1.24    |
| 4-Heptanone             | 1.49~8.81    | 4.19 <sup>a</sup> ±3.25    | 3.17~14.17  | 7.61 <sup>a</sup> ±3.63   | 4.69~12.09  | 7.47 <sup>a</sup> ±3.26     | 2.01~6.54   | 4.14 <sup>a</sup> ±1.62    |
| 2-Heptanone             | 2.85~6.26    | 4.57 <sup>b</sup> ±1.29    | 5.87~22.29  | 10.49 <sup>a</sup> ±5.25  | 10.8~11.55  | 11.22 <sup>a</sup> ±0.33    | 7.25~20.6   | 14.32 <sup>a</sup> ±4.67   |
| 2-Octanone              | 0.67~1.82    | 1.3 <sup>a</sup> ±0.42     | 0.53~1.38   | 1.13 <sup>a</sup> ±0.28   | 0.9~1.54    | 1.25 <sup>a</sup> ±0.30     | 0.66~1.87   | 1.26 <sup>a</sup> ±0.45    |
| 2-Nonanone              | 1.13~13.97   | 7.53 <sup>b</sup> ±4.67    | 2.23~18.18  | 9.26 <sup>ab</sup> ±4.70  | 9.17~26.36  | 15.61 <sup>a</sup> ±7.58    | 5.41~10.93  | 8.27 <sup>b</sup> ±2.24    |
| 2-Decanone              | nd           | nd <sup>a</sup>            | nd          | nd <sup>a</sup>           | 0.21~0.24   | 0.22 <sup>a</sup> ±0.02     | 0.22~0.77   | 0.38 <sup>a</sup> ±0.3     |
| 2-Furfural              | 9267~26501   | 17916 <sup>bc</sup> ±7348  | 9743~37037  | 24202 <sup>ab</sup> ±8346 | 25548~29652 | 27121 <sup>a</sup> ±1934    | 8995 ~16934 | 12419 <sup>c</sup> ±2652   |
| 5-Methyl-2-furfural     | 68.08~154.7  | 124 <sup>ab</sup> ±31.56   | 117.8~171.9 | 145.1 <sup>a</sup> ±20.99 | 101.5~150.1 | 119.28 <sup>ab</sup> ±21.36 | 47.19~160.8 | 100.2 <sup>b</sup> ±40.72  |
| 3-Pentene-2-one         | 565.9~1563   | 1069 <sup>a</sup> ±362.2   | 651.~1625.6 | 1111 <sup>a</sup> ±377    | 920.7~1622  | 1267 <sup>a</sup> ±287      | 933.6~1784  | 1368 <sup>a</sup> ±299.4   |
| 1-Octen-3- one          | 0.07~0.08    | 0.07 <sup>b</sup> ±1       | 0.07~0.18   | 0.09 <sup>ab</sup> ±0.04  | 0.08~0.09   | 0.09 <sup>ab</sup> ±0.02    | 0.09~0.21   | 0.13 <sup>a</sup> ±0.06    |
| 6-Methyl-5-hepten-2-one | 0.19~1.09    | 0.63 <sup>a</sup> ±0.37    | 0.3~0.86    | 0.49 <sup>b</sup> ±0.3    | 0.7~0.91    | 0.8 <sup>a</sup> ±0.10      | 0.19~0.5    | 0.33 <sup>b</sup> ±0.2     |
| 2-Cyclohexen-1-one      | 0.02~0.04    | 0.03 <sup>c</sup> ±0.02    | 0.04~0.08   | 0.06 <sup>bc</sup> ±0.02  | 0.09~0.14   | 0.11 <sup>b</sup> ±0.03     | 0.14~0.36   | 0.24 <sup>a</sup> ±0.09    |
| Cyclopentanone          | 1.86~9.29    | 4.24 <sup>b</sup> ±2.100   | 2.28~6.1    | 3.87 <sup>b</sup> ±1.47   | 7.67~11.81  | 9.96 <sup>a</sup> ±2.02     | 1.67~5.3    | 3.26 <sup>b</sup> ±1.20    |
| Cyclohexanone           | 5.32~8.04    | 6.27 <sup>a</sup> ±2       | 5.49~8.05   | 6.87 <sup>a</sup> ±0.82   | 6.44~6.96   | 6.65 <sup>a</sup> ±0.26     | 2.52~9.26   | 5.45 <sup>a</sup> ±2.37    |
| Acetoin                 | 56010~107267 | 72713 <sup>a</sup> ±21387  | 14992~83110 | 41284 <sup>b</sup> ±20640 | 19636~38068 | 27832 <sup>b</sup> ±7637    | 5356~77376  | 36455 <sup>b</sup> ±25054  |

|                    |             |                           |            |                          |             |                         |             |                           |
|--------------------|-------------|---------------------------|------------|--------------------------|-------------|-------------------------|-------------|---------------------------|
| Acetophenone       | 10.3~120.7  | 42.2 <sup>a</sup> ±31.0   | 16.9~49.6  | 29.8 <sup>a</sup> ±10.3  | 18.7~36.8   | 27.7 <sup>a</sup> ±20.0 | 13.7~93.0   | 45.7 <sup>a</sup> ±28.8   |
| 2-Phenyl-2-butenal | 178.7~582.6 | 387.7 <sup>b</sup> ±172.6 | 722.7~1391 | 1100 <sup>a</sup> ±239.1 | 547.8~905.5 | 646 <sup>b</sup> ±173.6 | 232.5~728.8 | 515.8 <sup>b</sup> ±180.5 |

\* area/area of internal standard.

nq: not quantified, nd: not detected.



**Table S5.** The range of volatile carbonyl compounds in semi-sweet *Huangjiu* from different production areas.

| Compound (μg/L)    | SSJ (n=4)           |                            | SSZ (n=6)           |                           | SSS (n=4)           |                            | SSF (n=3)           |                           | SSN (n=11)          |                            |
|--------------------|---------------------|----------------------------|---------------------|---------------------------|---------------------|----------------------------|---------------------|---------------------------|---------------------|----------------------------|
|                    | Concentration range | Mean±SD                    | Concentration range | Mean±SD                   | Concentration range | Mean±SD                    | Concentration range | Mean±SD                   | Concentration range | Mean±SD                    |
| Propanal           | 40.33~80.58         | 58.46 <sup>ab</sup> ±18.09 | 10.14~68.83         | 39.44 <sup>b</sup> ±24.66 | 21.12~105.3         | 63.3 <sup>ab</sup> ±34.62  | 66.01~94.68         | 81.07 <sup>a</sup> ±14.39 | 11.19~79.55         | 45.86 <sup>ab</sup> ±19.54 |
| Butanal            | 3.78~12.9           | 7.83 <sup>ab</sup> ±3.78   | 1.33~8.1            | 4.06 <sup>bc</sup> ±2.54  | 6.87~12             | 9.16 <sup>a</sup> ±2.56    | 2.37~10.93          | 6.59 <sup>ab</sup> ±4.28  | 0.56~6.41           | 2.97 <sup>c</sup> ±2.18    |
| Pentanal           | 16.55~47.7          | 27.17 <sup>a</sup> ±14.24  | 9.69~25.01          | 14.8 <sup>a</sup> ±5.95   | 8.14~72.17          | 28.78 <sup>a</sup> ±29.28  | 12.91~35.09         | 27.56 <sup>a</sup> ±12.69 | 8.53~39.79          | 19.76 <sup>a</sup> ±9.26   |
| Hexanal            | 27.35~43.78         | 35.12 <sup>a</sup> ±6.75   | 22.09~45.26         | 30.9 <sup>a</sup> ±8.24   | 15.6~76.73          | 31.23 <sup>a</sup> ±30.34  | 19.09~63.88         | 35.78 <sup>a</sup> ±24.47 | 10.69~61.59         | 32.91 <sup>a</sup> ±14.27  |
| Heptanal           | 0.68~1.69           | 1.13 <sup>a</sup> ±0.42    | 0.63~1.99           | 1.18±0.5                  | 0.51~1.4            | 0.9±0.45                   | 1.03~3.15           | 1.9±1.11                  | 0.68~2.72           | 1.73 <sup>a</sup> ±0.79    |
| Octanal            | 0.43~0.6            | 0.51 <sup>a</sup> ±0.07    | 0.42~5.49           | 1.84 <sup>a</sup> ±2.18   | 0.27~0.51           | 0.39±0.11                  | 0.43~0.52           | 0.49±0.05                 | 0.27~1.93           | 0.74 <sup>a</sup> ±0.54    |
| Nonanal            | 1.76~16.57          | 7.19 <sup>a</sup> ±6.86    | 0~6.74              | 3.92 <sup>a</sup> ±3.14   | 0.56~7.14           | 4.03 <sup>a</sup> ±3.01    | 7.32~12.14          | 10.25 <sup>a</sup> ±2.57  | 0.6~17.21           | 6.51 <sup>a</sup> ±5.71    |
| Decanal            | 9.34~16.85          | 12.58 <sup>ab</sup> ±3.16  | 2.59~10.39          | 6.43 <sup>ab</sup> ±3.94  | 4.37~25.27          | 13.1 <sup>a</sup> ±9.75    | 6.83~7.73           | 7.37 <sup>ab</sup> ±0.48  | 0.08~9.09           | 5.41 <sup>b</sup> ±2.89    |
| Undecanal          | 0.73~4.66           | 2.25 <sup>a</sup> ±1.78    | 0~9.27              | 4.58 <sup>a</sup> ±3.86   | 0.91~3.01           | 2.19±0.94                  | 1.29~5.23           | 2.79 <sup>a</sup> ±2.13   | 0~5.85              | 1.59 <sup>a</sup> ±2.08    |
| Dodecanal          | 2.81~6.99           | 4.82 <sup>a</sup> ±1.79    | 0.75~5.92           | 2.34 <sup>a</sup> ±1.91   | 1.58~9.93           | 4.85 <sup>a</sup> ±3.57    | 2.09~3.22           | 2.53 <sup>a</sup> ±0.6    | 0~23.17             | 3.39 <sup>a</sup> ±6.82    |
| Tridecanal         | nd                  | nd <sup>a</sup>            | nd                  | nd <sup>a</sup>           | nd                  | nd <sup>a</sup>            | nd                  | nd <sup>a</sup>           | nd                  | nd <sup>a</sup>            |
| 2-Propenal         | 6.24~13.18          | 9.33 <sup>a</sup> ±3       | 2.04~5.42           | 3.59 <sup>a</sup> ±1.17   | 3.98~15.63          | 7.68 <sup>a</sup> ±5.39    | 2.35~6.63           | 4.18 <sup>a</sup> ±2.2    | 3.19~234.59         | 48.86 <sup>a</sup> ±71.03  |
| (E)-2-Butenal      | 224.1~620           | 380.8 <sup>a</sup> ±174.7  | 130.6~744.3         | 384.8 <sup>a</sup> ±234.9 | 312.8~483.4         | 400 <sup>a</sup> ±90.61    | 76.45~128.9         | 97.94 <sup>b</sup> ±27.5  | 69.5~272.1          | 137.3 <sup>b</sup> ±68.13  |
| (E)-2-Pentenal     | 2.26~3.52           | 2.97 <sup>a</sup> ±0.65    | 1.44~2.46           | 2.06 <sup>a</sup> ±0.45   | 1.15~2.53           | 1.95 <sup>a</sup> ±0.67    | 1.59~2.99           | 2.19±0.72                 | 0.3~5.92            | 1.25 <sup>a</sup> ±1.68    |
| (E)-2-Hexenal      | 0.5~1.31            | 0.87 <sup>b</sup> ±0.34    | 0.55~2.7            | 1.38 <sup>b</sup> ±0.75   | 0.69~1.62           | 1.05 <sup>b</sup> ±0.41    | 1.18~1.71           | 1.36 <sup>b</sup> ±0.3    | 0.73~9.86           | 5.07 <sup>a</sup> ±2.32    |
| (E)-2-Heptenal     | 0.1~0.11            | 0.11 <sup>a</sup> ±0.01    | 0.1~0.12            | 0.11 <sup>a</sup> ±0.01   | 0.1~0.11            | 0.11±0                     | 0.1~0.1             | 0.1 <sup>a</sup> ±0       | 0.13~0.48           | 0.21 <sup>a</sup> ±0.11    |
| (E)-2-Octenal      | 0.33~0.38           | 0.36 <sup>a</sup> ±0.02    | 0.3~0.36            | 0.33 <sup>a</sup> ±0.02   | 0.32~0.35           | 0.33 <sup>a</sup> ±0.01    | 0.32~0.43           | 0.37 <sup>a</sup> ±0.05   | 0.32~1.18           | 0.49 <sup>a</sup> ±0.24    |
| (E)-2-Nonenal      | 0.34~0.45           | 0.38 <sup>a</sup> ±0.05    | 0.35~0.4            | 0.37 <sup>a</sup> ±0.02   | 0.33~0.56           | 0.39 <sup>a</sup> ±0.11    | 0.33~0.35           | 0.34 <sup>a</sup> ±0.01   | 0.34~0.64           | 0.43 <sup>a</sup> ±0.09    |
| (E)-2-Decenal      | nd                  | nd <sup>a</sup>            | nd                  | nd <sup>a</sup>           | nd                  | nd <sup>a</sup>            | nd                  | nd <sup>a</sup>           | nq~0.26             | 0.04 <sup>a</sup> ±0.08    |
| 2-Methylpropanal   | 1016~1582           | 1281 <sup>a</sup> ±235.2   | 233.1~950.4         | 548.7 <sup>a</sup> ±271.3 | 315.4~1053          | 676.6 <sup>bc</sup> ±318.5 | 631.3~1395          | 1019 <sup>ab</sup> ±382.2 | 191.3~387.6         | 308.7 <sup>c</sup> ±63.41  |
| 2-Methylbutanal    | 649.3~1188          | 941.1 <sup>a</sup> ±231.5  | 254.1~746.1         | 455 <sup>bc</sup> ±178.8  | 185.1~650.7         | 446.7 <sup>bc</sup> ±194.3 | 568.7~778.5         | 643.3 <sup>b</sup> ±117.3 | 166.3~476           | 268.6 <sup>c</sup> ±89.44  |
| 3-Methylbutanal    | 3216~4631           | 3788 <sup>a</sup> ±689.4   | 1155~3443           | 2065 <sup>b</sup> ±850.8  | 789.8~3577          | 1921 <sup>b</sup> ±1188    | 2310~3829           | 2840 <sup>ab</sup> ±856.7 | 348.9~933.8         | 705.4 <sup>a</sup> ±184.9  |
| 3-Methyl-2-butenal | 6.11~7.39           | 6.95 <sup>a</sup> ±0.58    | 3.2~8.1             | 5.1 <sup>a</sup> ±1.81    | 3.63~5.42           | 4.62 <sup>a</sup> ±0.75    | 2.57~5.82           | 4.07 <sup>a</sup> ±1.64   | 1.88~9.42           | 4.43 <sup>a</sup> ±2.54    |

|                         |             |                            |             |                            |              |                             |             |                            |             |                            |
|-------------------------|-------------|----------------------------|-------------|----------------------------|--------------|-----------------------------|-------------|----------------------------|-------------|----------------------------|
| Methional               | 311~1477    | 741 <sup>ab</sup> ±536.4   | 83.62~336   | 169.7 <sup>b</sup> ±102.2  | 195.5~272.7  | 247.5 <sup>b</sup> ±35.57   | 195~2389    | 1041 <sup>a</sup> ±1180    | nd~628      | 213.3 <sup>b</sup> ±183.4  |
| Benzaldehyde            | 904~2450    | 1438 <sup>a</sup> ±690.5   | 501.4~2917  | 1946 <sup>a</sup> ±1089    | 126.2~2404   | 1427 <sup>a</sup> ±1075     | 821.5~1148  | 993.7 <sup>b</sup> ±163.9  | 2.94~371.4  | 132.8 <sup>b</sup> ±125.5  |
| Phenyl acetaldehyde     | 177.7~272.7 | 210.1 <sup>a</sup> ±43.61  | 175.3~257.9 | 210.2 <sup>a</sup> ±31.38  | 38.23~125.5  | 72.71 <sup>b</sup> ±39.68   | 203.6~282.5 | 235.4 <sup>a</sup> ±41.64  | 68.34~234.6 | 127.2 <sup>b</sup> ±52.78  |
| 2-Phenyl-2-butenal      | 207.6~326.8 | 248.9 <sup>ab</sup> ±53.06 | 161.1~955.2 | 511.2 <sup>a</sup> ±361.5  | 72.48~188    | 109 <sup>b</sup> ±53.16     | 114.2~642.3 | 313.1 <sup>ab</sup> ±287.1 | 10.82~453.2 | 89.72 <sup>b</sup> ±142.3  |
| Diacetyl                | 39.72~82.07 | 58.45 <sup>a</sup> ±19.53  | 32.01~90.03 | 54.16 <sup>a</sup> ±23.64  | 43.84~164.2  | 94.77 <sup>a</sup> ±56.56   | 5.48~203.03 | 73.01 <sup>a</sup> ±112.6  | 21.42~389.3 | 147.16 <sup>a</sup> ±121.8 |
| Glyoxal                 | 1444~1655   | 1540 <sup>a</sup> ±86.56   | 594.8~2124  | 1420 <sup>a</sup> ±642.1   | 523.4~1609   | 1110 <sup>a</sup> ±551.9    | 525.2~1722  | 1259 <sup>a</sup> ±642.9   | 571.2~2371  | 1592 <sup>a</sup> ±609     |
| Methyl glyoxal          | 831.5~1166  | 956.9 <sup>a</sup> ±153.7  | 290.2~1099  | 675.3 <sup>a</sup> ±341.7  | 452.5~729.5  | 608.6 <sup>a</sup> ±115.4   | 347.1~1213  | 645.5 <sup>a</sup> ±491.4  | 353.5~6434  | 2323 <sup>a</sup> ±2259    |
| 2-Butanone*             | 227.4~1396  | 603.4 <sup>a</sup> ±538.1  | 133.6~1554  | 760.8 <sup>a</sup> ±550    | 309.1~851.2  | 558.4 <sup>a</sup> ±236.1   | 184~1080    | 535. <sup>a</sup> ±478.1   | 53.55~403.1 | 209.9 <sup>a</sup> ±117.5  |
| 3-Methyl-2-butanone     | 4.11~20.1   | 8.39 <sup>ab</sup> ±7.82   | 1.09~11.41  | 5.92 <sup>ab</sup> ±3.99   | 4.99~9.61    | 7.36 <sup>ab</sup> ±2.16    | 2.95~20.29  | 9.08 <sup>a</sup> ±9.72    | 0.27~2.65   | 1.41 <sup>b</sup> ±0.56    |
| 2-Pentanone             | 4.33~5.34   | 4.72 <sup>a</sup> ±0.44    | 4.03~4.93   | 4.44 <sup>a</sup> ±0.36    | 5.26~8.93    | 7.07 <sup>a</sup> ±1.56     | 4.29~4.45   | 4.39 <sup>a</sup> ±0.09    | 3.73~11.55  | 5.87 <sup>a</sup> ±2.64    |
| 3-Pentanone             | 3.24~4.36   | 3.77 <sup>a</sup> ±0.59    | 0~11.55     | 5.23 <sup>a</sup> ±4.3     | 0.28~5.84    | 3.18 <sup>a</sup> ±2.42     | nq~9.99     | 3.38 <sup>a</sup> ±5.73    | 1.74~7.98   | 4.04 <sup>a</sup> ±2.12    |
| 2-Hexanone              | 1.01~2.53   | 1.71 <sup>a</sup> ±0.66    | 0.96~2.36   | 1.64 <sup>a</sup> ±0.55    | 1.61~1.77    | 1.66 <sup>a</sup> ±0.07     | 0.36~1.21   | 0.7 <sup>a</sup> ±0.45     | 0.19~2.64   | 0.81 <sup>a</sup> ±0.81    |
| 4-Heptanone             | 2.14~4.87   | 3.17 <sup>ab</sup> ±1.26   | 1.56~5.9    | 3.09 <sup>ab</sup> ±1.47   | 3.9~8.42     | 5.26 <sup>a</sup> ±2.12     | 0.49~1.43   | 0.88 <sup>b</sup> ±0.49    | 0.4~5.69    | 2.15 <sup>b</sup> ±2.14    |
| 2-Heptanone             | 1.76~5.1    | 3.33 <sup>a</sup> ±1.53    | 3.99~8.02   | 5.64 <sup>a</sup> ±1.6     | 2.23~5.72    | 3.33 <sup>a</sup> ±1.61     | 1.75~13.15  | 5.85 <sup>a</sup> ±6.33    | 0.7~5.46    | 2.26 <sup>a</sup> ±1.44    |
| 2-Octanone              | 0.43~1.31   | 0.88 <sup>a</sup> ±0.36    | 0.46~0.97   | 0.71 <sup>ab</sup> ±0.2    | 0.51~0.69    | 0.6 <sup>ab</sup> ±0.1      | 0.13~0.61   | 0.29 <sup>b</sup> ±0.27    | 0.22~1.17   | 0.58 <sup>ab</sup> ±0.31   |
| 2-Nonanone              | 5.32~13.25  | 8.97 <sup>a</sup> ±3.32    | 4.83~10.74  | 7.81 <sup>a</sup> ±2.68    | 0.6~8.49     | 4.56 <sup>ab</sup> ±3.3     | 1.87~16.54  | 7.14 <sup>a</sup> ±8.16    | nd~3.68     | 1.03 <sup>b</sup> ±1.27    |
| 2-Decanone              | 0.2~0.26    | 0.23 <sup>a</sup> ±0.03    | 0.2~0.24    | 0.22 <sup>ab</sup> ±0.02   | 0.18~0.22    | 0.2 <sup>ab</sup> ±0.02     | 0.19~0.23   | 0.21 <sup>ab</sup> ±0.02   | nd~0.29     | 0.09 <sup>b</sup> ±0.12    |
| 2-Furfural              | 13005~21347 | 17128 <sup>a</sup> ±3846   | 4187~19885  | 11646 <sup>a</sup> ±6165   | 6090~15472   | 10341 <sup>a</sup> ±4119    | 7315~11530  | 8771 <sup>a</sup> ±2390    | 1363~19676  | 12609 <sup>a</sup> ±6072   |
| 5-Methyl-2-furfural     | 52.2~76.74  | 66.52 <sup>b</sup> ±11.6   | 56.35~207.6 | 119.2 <sup>ab</sup> ±59.83 | 41.61~76.45  | 51.27 <sup>b</sup> ±16.81   | 66.5~201.3  | 145.4 <sup>a</sup> ±70.29  | 44.72~179.8 | 108.7 <sup>ab</sup> ±40.06 |
| 3-Pentene-2-one         | 747.3~1889  | 1141 <sup>a</sup> ±519.9   | 270.4~1199  | 734.9 <sup>a</sup> ±354.1  | 532.9~2491   | 1246 <sup>a</sup> ±859.6    | 533.7~1001  | 770.3 <sup>a</sup> ±233.9  | 301.1~2870  | 1568 <sup>a</sup> ±838.5   |
| 1-Octen-3- one          | 0.07~0.08   | 0.08 <sup>a</sup> ±0       | 0.07~0.11   | 0.08 <sup>a</sup> ±0.01    | 0.08~0.09    | 0.08 <sup>a</sup> ±0.01     | nd~0.12     | 0.07 <sup>a</sup> ±0.06    | nd~0.25     | 0.09 <sup>a</sup> ±0.08    |
| 6-Methyl-5-hepten-2-one | 0.2~0.9     | 0.54 <sup>a</sup> ±0.31    | 0.36~0.92   | 0.48 <sup>a</sup> ±0.22    | 0.3~0.96     | 0.52 <sup>a</sup> ±0.3      | 0.28~0.79   | 0.53 <sup>a</sup> ±0.26    | 0.22~2      | 0.86 <sup>a</sup> ±0.55    |
| 2-Cyclohexen-1-one      | 0.03~0.05   | 0.04 <sup>a</sup> ±0.01    | 0.02~0.09   | 0.05 <sup>a</sup> ±0.02    | 0.01~0.03    | 0.02 <sup>a</sup> ±0.01     | nd~0.1      | 0.03 <sup>a</sup> ±0.06    | 0~2.88      | 0.36 <sup>a</sup> ±0.85    |
| Cyclopentanone          | 1.41~4.3    | 2.41 <sup>b</sup> ±1.32    | 1.77~3.41   | 2.62 <sup>b</sup> ±0.68    | 1.61~5.24    | 4.05 <sup>ab</sup> ±1.65    | 2.54~4.18   | 3.42 <sup>ab</sup> ±0.82   | 2.1~23.43   | 10.92 <sup>a</sup> ±7.05   |
| Cyclohexanone           | 5.58~7.48   | 6.44 <sup>a</sup> ±0.98    | 5.1~7.14    | 6.25 <sup>a</sup> ±0.8     | 5.31~6.3     | 5.82 <sup>a</sup> ±0.53     | 4.4~7.47    | 6.21 <sup>a</sup> ±1.61    | 5.05~17.6   | 7.42 <sup>a</sup> ±3.58    |
| Acetoin                 | 23411~89406 | 56128 <sup>ab</sup> ±31504 | 501.4~3917  | 2113 <sup>b</sup> ±1319    | 19750~345311 | 123196 <sup>a</sup> ±152457 | 15419~79871 | 52507 <sup>ab</sup> ±33308 | 3220~47335  | 16602 <sup>b</sup> ±12978  |

|                    |             |                            |             |                           |           |                         |             |                            |             |                           |
|--------------------|-------------|----------------------------|-------------|---------------------------|-----------|-------------------------|-------------|----------------------------|-------------|---------------------------|
| Acetophenone       | 29.0~117.3  | 79.8 <sup>ab</sup> ±38.7   | 21.0~84.0   | 34.7 <sup>b</sup> ±24.3   | 11.0~72.1 | 33.8 <sup>b</sup> ±26.9 | 30.4~154.5  | 102.8 <sup>a</sup> ±64.6   | 11.4~114.1  | 58.9 <sup>ab</sup> ±31.2  |
| 2-Phenyl-2-butenal | 207.6~326.8 | 248.9 <sup>ab</sup> ±53.06 | 161.1~955.2 | 511.2 <sup>a</sup> ±361.5 | 72.48~188 | 109 <sup>b</sup> ±53.16 | 114.2~642.3 | 313.1 <sup>ab</sup> ±287.1 | 10.82~453.2 | 89.72 <sup>b</sup> ±142.3 |

\* area/area of internal standard.

nq: not quantified, nd: not detected.
