# Supplementary material for: Differentiating Huangjiu with Varying Sugar Contents from Different Regions Based on Targeted Metabolomics Analyses of Volatile Carbonyl Compounds
Source: MDPI journal article supplement (doi:10.3390/foods12071455), 2023-03-29
Supplement: s1 [file s1]

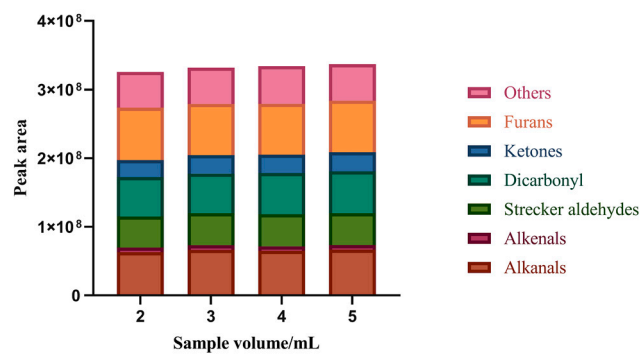

**Figure S1.** Effect of sample volume on extraction efficiency

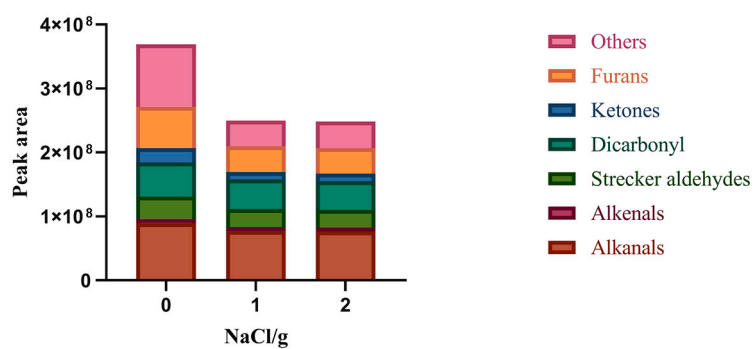

**Figure S2.** Effect of ionic strength on extraction efficiency

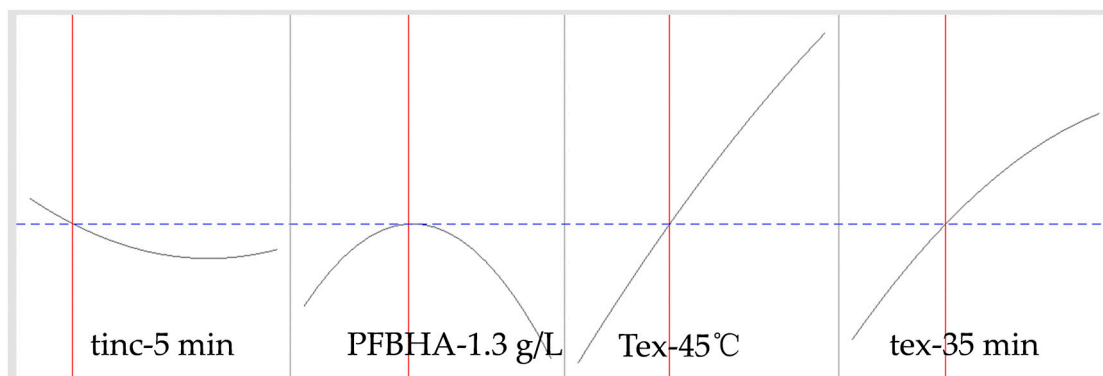

**Figure S3.** The result of the corresponding optimizer

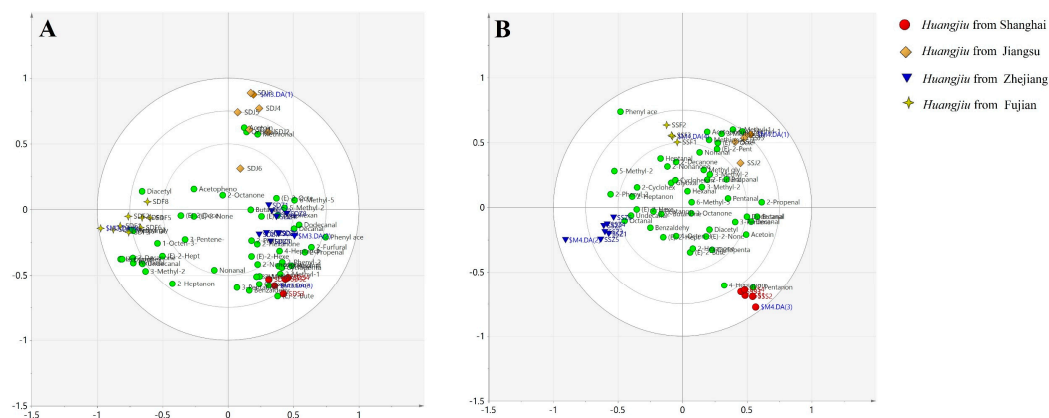

**Figure S4.** The OPLS-DA biplot of *Huangjiu* from different regions.  
 (A) Semi-dry *Huangjiu* from different regions, and (B) semi-sweet *Huangjiu* from different regions
